# Supplementary material
Source: PubMed Central journal article supplement (PMC3143656)

**OXIDATION OF 3,4-DIHYDROXYPHENYLACETALDEHYDE, A TOXIC  
DOPAMINERGIC METABOLITE, TO A SEMI-QUINONE RADICAL AND AN *ORTHO*-  
QUINONE**

**David G. Anderson<sup>1</sup>, S. V. Santhana Mariappan<sup>2</sup>, Garry R. Buettner<sup>3</sup>, Jonathan A. Doorn<sup>1\*</sup>**

Division of Medicinal and Natural Products Chemistry, College of Pharmacy, University of Iowa,  
Iowa City, IA 52242-1112<sup>1</sup>, Central High Field NMR Research Facility, Department of  
Chemistry, University of Iowa, Iowa City, IA 52242-1294<sup>2</sup>, and Free Radical and Radiation  
Biology Program, ESR Facility, Department of Radiation Oncology, College of Medicine,  
University of Iowa, Iowa City, IA 52242-1101<sup>3</sup>

Running head: Oxidation of DOPAL

Address Correspondence to: Jonathan A. Doorn, Ph. D., 115 So. Grand Ave, College of  
Pharmacy, Iowa City, IA 52242-1112. Telephone: 319-335-8834. Fax: 319-335-8766. Email:  
[jonathan-doorn@uiowa.edu](mailto:jonathan-doorn@uiowa.edu)

### Supplementary Tables

Supplementary Table 1. Summary of NMR Correlations and Cross-Peaks.

| <u>Experiment</u> | <u>Cross-Peaks Evident</u>         |
|-------------------|------------------------------------|
| COSY              | H1-H2; H2-H4; H7-H8;               |
| NOSEY             | H1-H4; H1-H8; H2-H4; H2-H8; H4-H8; |
| HMQC              | H1-C1; H2-C2; H4-C4; H7-C7; H8-C8; |
| HMBC              | H2-C3; H4-C5; H7-C3; H7-C6; H8-C5; |

Supplementary Table 2. <sup>1</sup>H and <sup>13</sup>C Peak Assignments for the DOPAL quinone.

| <u>Position</u> | <u><sup>1</sup>H Shift</u> | <u><sup>13</sup>C Shift</u> |
|-----------------|----------------------------|-----------------------------|
| 1               | 5.17                       | 89.8                        |
| 2               | 2.65                       | 44.4                        |
| 3               | n/a                        | 152.5                       |
| 4               | 6.24                       | 128.8                       |
| 5               | n/a                        | 181.0                       |
| 6               | n/a                        | 180.3                       |
| 7               | 7.20                       | 144.1                       |
| 8               | 6.28                       | 128.9                       |

All values reported in ppm.

### Supplementary Figures

Supplementary Figure 1. Structure of the DOPAL-*ortho*-quinone. The numbered positions indicate atom locations for all supplementary figures.

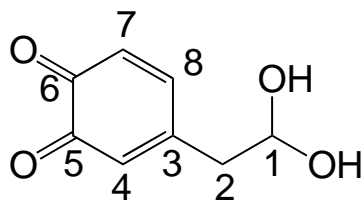

Supplementary Figure 2.  $^1\text{H}$ - $^1\text{H}$  COSY NMR Spectrum of Oxidized DOPAL. The figure is annotated to highlight relevant cross-peaks (A). The aromatic region is magnified for clarity (B). COSY is a homonuclear correlation technique for determining proton couplings in a molecule.

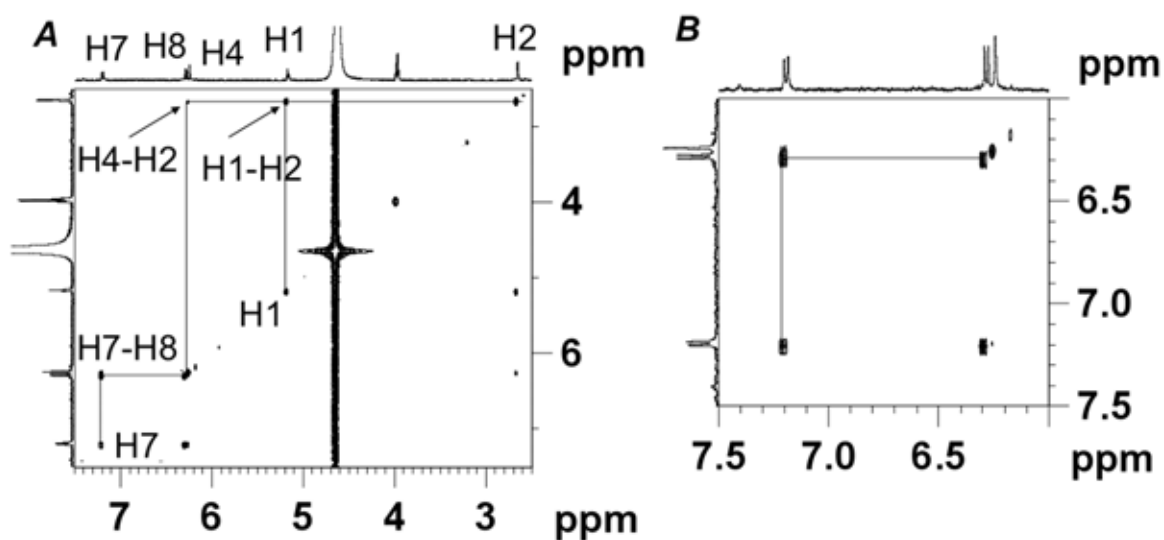

Supplementary Figure 3.  $^1\text{H}$ - $^1\text{H}$  NOESY NMR Spectrum of Oxidized DOPAL. The spectrum is annotated to highlight relevant cross-peaks (A). The aromatic region is magnified for clarity (B). NOESY is a homonuclear correlation technique for identifying resonances that are in close spatial proximity within a molecule.

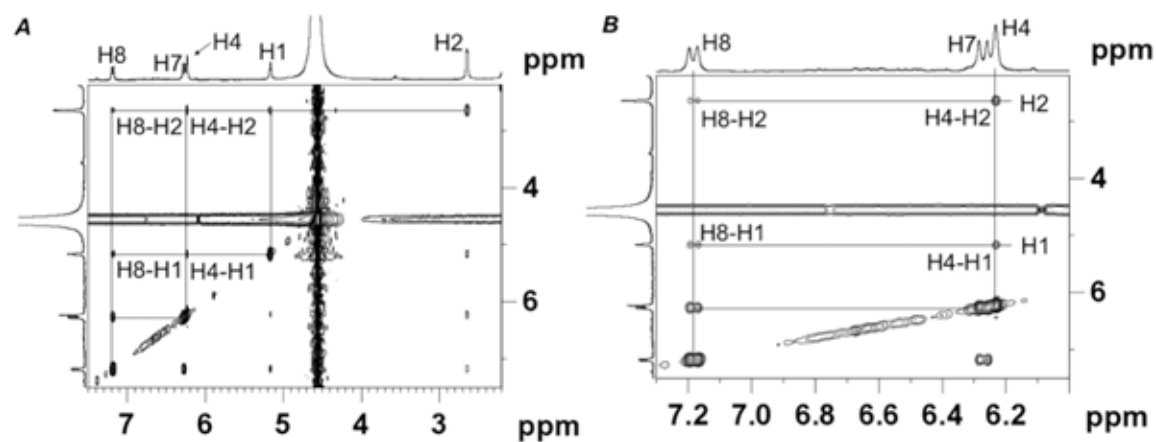

Supplementary Figure 4.  $^1\text{H}$ - $^{13}\text{C}$  HMQC NMR Spectra of Oxidized DOPAL. The spectrum is annotated to highlight relevant cross-peaks. HMQC is a 2D inverse correlation technique for determining direct (single bond) heteronuclear couplings in a molecule.

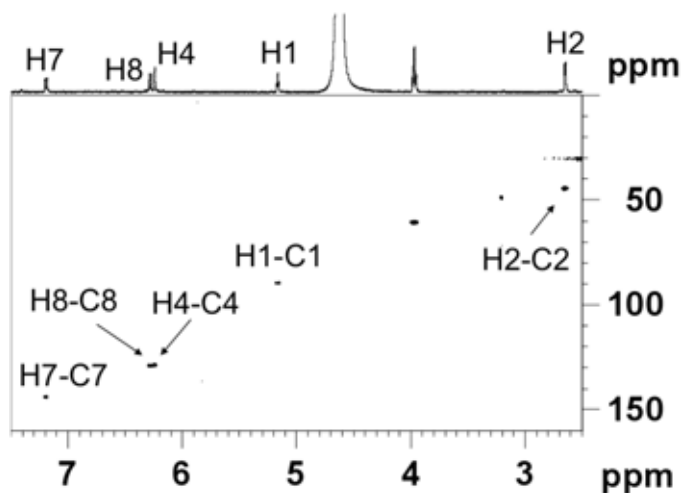

Supplementary Figure 5.  $^1\text{H}$ - $^{13}\text{C}$  HMBC NMR Spectrum of Oxidized DOPAL. The spectrum is annotated to highlight relevant cross-peaks. HMBC is a 2D inverse correlation technique for determining long range (2-4 bond) heteronuclear couplings in a molecule.

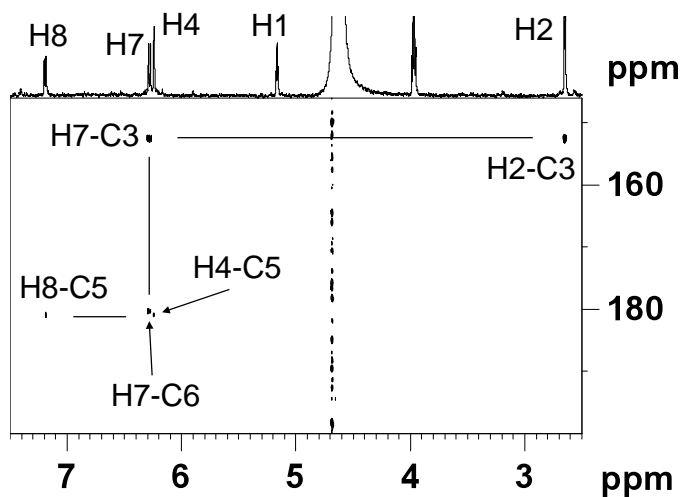

Supplementary Figure 6. Lifetime of the DOPAL Quinone Over Time. The relative intensities of the 8.44 ppm peak (hypothesized polymer) and the quinone are shown over time.

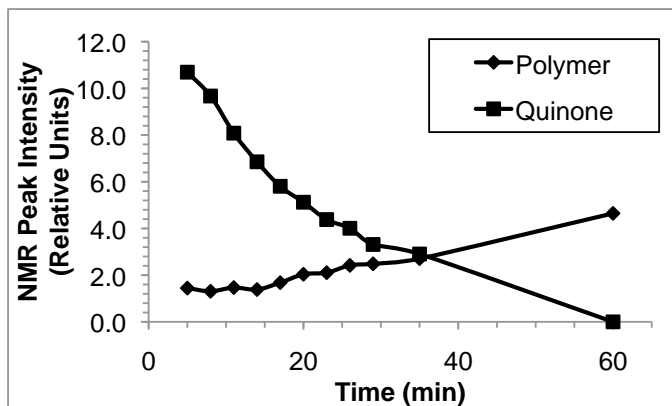

Supplement: supp_M111.249532_jbc.M111.249532-1.pdf [file supp_M111.249532_jbc.M111.249532-1.pdf]
